# Supplementary material
Source: PubMed Central journal article supplement (PMC7853095)
Supplement: 41423_2019_297_MOESM1_ESM.pdf [file 41423_2019_297_MOESM1_ESM.pdf]

1 **Yang et al**, Bcl10 is required for the development and suppressive function of Foxp3<sup>+</sup>  
2 regulatory T cells

3

4 **Supplementary Figures**

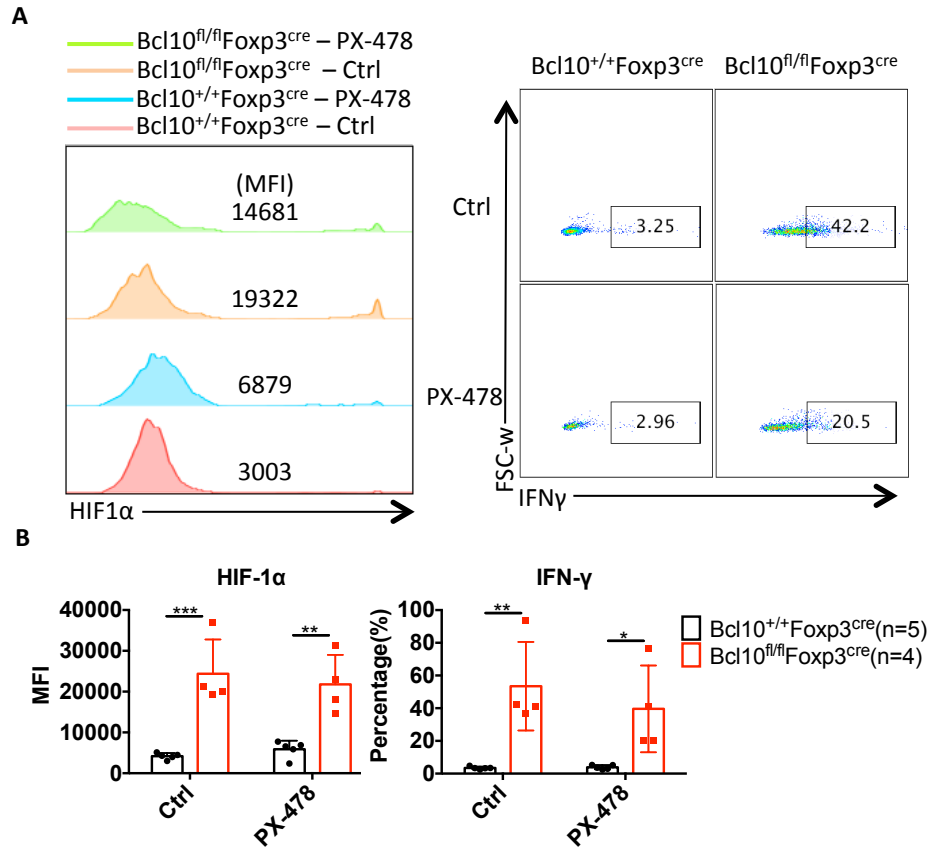

5

6 **Supplementary Fig.1**

7 (A) Treg cells (CD4<sup>+</sup>Foxp3<sup>+</sup>) in the spleen and lymph nodes from Bcl10<sup>+/+</sup>Foxp3<sup>cre</sup> or  
8 Bcl10<sup>fl/fl</sup>Foxp3<sup>cre</sup> mice were stimulated with anti-CD3/CD28 and incubated with or  
9 without 20μM HIF1α inhibitor PX-478 for 48h, the last 4 hour add Protein Transport  
10 inhibitor to accumulate the cytokines. The MFI (Mean Fluorescence Intensity) of  
11 HIF1α (left) and the expression of IFNγ (right) were measured by flow cytometry.

12 (B) Statistical analysis of the expression of HIF1α (left) and IFNγ expression  
13 percentage (right) in Treg cells from (A).

14

15

16 **Table. S1. Oligo sequences for Bcl10<sup>fl</sup> mouse generation**

| Oligo name                    | Sequence (5'-3')                                                                                                                              |
|-------------------------------|-----------------------------------------------------------------------------------------------------------------------------------------------|
| Bcl10-loxp gRNA1              | aaacccggagctgagcgacg                                                                                                                          |
| Bcl10-loxp gRNA2              | ctgaagtgggttatgacga                                                                                                                           |
| Bcl10-loxp donor1             | agcggggcgggcgggcggaggaaagcggaaacccggagct<br>gagcgacgATAACTTCGTATAATGTATGCTATACG<br>AAGTTATgggaacttcaggtcggagagcgcggggtcctg<br>gcacagcagcactg  |
| Bcl10-loxp donor2             | agtagtagtcttattcagaaaaagaagtgagacttgaagtgg<br>ggtatgATAACTTCGTATAATGTATGCTATACGAA<br>GTTATacgacggcattataaattgctgtggtggtgacagg<br>agccagccttgg |
| Bcl10-loxp1-F<br>(genotyping) | ggacgtgagtagtccgcg                                                                                                                            |
| Bcl10-loxp1-R<br>(genotyping) | gtctccagccagctcccggg                                                                                                                          |
| Bcl10-loxp2-F<br>(genotyping) | gcctgggcatggaggctcc                                                                                                                           |
| Bcl10-loxp2-R<br>(genotyping) | gcgacgagcggatggcaagg                                                                                                                          |

17
